# Supplementary material for: Temporal Integration Windows for Naturalistic Visual Sequences
Source: PLoS One. 2014 Jul 10;9(7):e102248. doi: 10.1371/journal.pone.0102248 (PMC4092072; doi:10.1371/journal.pone.0102248)
Supplement: File S1 — Individual subject and video data for experiments 1 and 2. This excel file includes mean DtF ratings for each subject and mean values for visual change and cross-cuts for each condition. (XLSX) [file pone.0102248.s001.xlsx]

## Sheet: Experiment 1
NORMALISED DtF FOR CONDITIONS AND PARTICIPANTS
	TIW (msec)	800			1600			3200			6400			12800
	Shuffle-Chunk (msec)	200	400	800	200	400	800	200	400	800	200	400	800	200	400	800
Participant	1	-0.240946	-0.735823	-0.523733	-0.129851	0.354926	-0.240946	-0.251045	0.0519404	0.253931	0.900301	-0.37224	-0.240946	0.839704	0.253931	-0.0288558
	2	-0.323666	-0.165366	-0.669945	-0.0466418	-0.284091	-0.739201	0.368894	-0.106004	0.576662	0.190807	-0.0466418	0.299638	0.665705	0.250169	-0.115898
	3	-0.659274	-0.323088	-1.05658	-0.160089	-0.384212	-0.587961	0.410409	0.410409	-0.0887764	0.410409	0.288159	0.12516	0.410409	0.593783	0.553033
	4	0.169299	-0.235368	-0.235368	-0.235368	-0.322082	-0.495511	0.0681327	0.11149	-0.235368	-0.134201	-0.0619388	0.0681327	0.545062	0.284919	0.7763
	5	0.537158	0.0630576	-0.231211	0.365501	-0.966884	-0.035032	-0.206689	0.259237	-0.62357	-0.14947	0.161147	-0.092251	0.537158	0.602551	-0.092251
	6	-0.273195	0.0856096	-0.546571	-0.213395	-0.213395	0.529845	0.265012	-0.273195	-0.0852499	-0.249275	0.0685237	-0.0852499	0.80322	0.171039	-0.0339921
	7	0.330593	0.330593	-0.75842	-0.0267392	0.449704	-0.452135	-0.0267392	-0.55423	0.773005	0.568815	-0.043755	-0.043755	-0.384072	-0.043755	0.05834
	8	-0.662137	-0.472402	-0.987397	-0.472402	-0.472402	-0.336877	0.286539	-0.282667	-0.174246	1.04548	0.0696986	0.151014	1.70955	0.638904	0.151014
	9	0.267431	-0.168383	-0.802294	-0.0891438	0.108954	-0.267431	0.178288	0.178288	0.267431	-0.0297146	-0.0990487	-0.208002	0.455624	0.0891438	0.208002
	10	-0.0979233	0.184966	-0.163206	0.359052	-0.119684	-0.685463	-0.29377	-0.272009	0.424334	-0.348172	0.413454	0.0979233	0.718105	-0.424334	0.228488
	11	0.579304	-0.424133	-0.424133	0.169738	-0.567481	0.415477	0.169738	0.149259	0.0468679	0.292607	-0.137437	-0.321741	0.149259	-0.424133	0.169738
	12	-0.6939	0.128299	-0.757146	-0.162633	-0.225879	-0.225879	0.368634	0.128299	-0.390319	0.899901	0.748111	-0.466214	0.672215	0.128299	-0.162633
	13	-0.332307	-0.332307	-0.590768	0.513566	-0.261818	-0.426293	0.372587	-0.0973425	-0.426293	0.231608	1.05398	-0.0503496	-0.0503496	0.889509	-0.473286
	14	-0.284375	-0.0189583	-0.225393	0.157986	-0.549791	-0.225393	0.600346	0.497129	-0.328611	0.157986	-0.535046	0.0842592	0.511874	-0.225393	0.246458
	15	-0.0421546	-0.295082	0.238876	-0.54801	0.463701	-0.252928	0.463701	0.210773	-0.0562062	0.210773	-0.351289	-0.0562062	0.54801	-0.351289	-0.351289
	mean DtF	-0.115073	-0.158559	-0.515553	-0.0345619	-0.199362	-0.268382	0.184936	0.0274251	-0.00442716	0.266524	0.0770455	-0.0492392	0.542098	0.162223	0.0755446
	cross cuts	16.1068	13.2331	4.6	14.49	10.8541	5.55954	25.2224	12.0592	5.67787	46.5263	16.1341	7.15313	50.8761	24.0597	8.20356
	visual change	0.10166	0.086692	0.0105512	0.144433	0.121453	0.0439462	0.240339	0.0943536	0.0475761	0.357017	0.126581	0.027299	0.408874	0.141603	0.0282904

## Sheet: Experiment 2
NORMALISED DtF FOR CONDITIONS AND PARTICIPANTS
	TIW (msec)	1200		2000		2800		3600		4400
	Shuffle-Chunk (msec)	200	400	200	400	200	400	200	400	200	400
Participant	1	0.815095	-0.0161939	-0.0161939	-0.0161939	-0.394053	-0.0161939	0.286093	-0.394053	-0.620768	-0.0917657
	2	-0.213277	-0.472919	0.630558	-0.0834562	0.306006	0.825289	0.0463646	0.565648	-0.213277	-0.148367
	3	-0.0940078	-0.84607	0.940078	-0.470039	0.752062	0.0940078	0.376031	-0.752062	0.188016	0.376031
	4	-0.294111	-0.0932546	0.258243	-1.09753	0.659955	-0.243897	0.559527	0.0573874	0.157815	0.107601
	5	-0.505913	0.421032	-0.178756	-0.724018	0.148401	0.257454	0.475558	-0.178756	0.475558	0.0393488
	6	-0.00550974	-0.391191	-0.391191	-0.159782	0.225899	0.303035	0.0716266	-0.159782	-0.082646	-0.159782
	7	-0.403268	0.168454	0.311384	-0.260338	-0.188872	-0.331803	0.597245	-0.546199	0.0969885	-0.0459419
	8	-0.0827171	-0.237122	0.380499	-0.0827171	0.148891	-0.545933	-0.00551447	-0.00551447	0.534904	-0.46873
	9	0.0196058	-0.186255	0.362707	-0.323495	0.431327	-0.117635	-0.186255	0.225467	0.362707	-0.460736
	10	-0.215806	-0.130365	-0.130365	0.0405187	0.724052	0.63861	0.63861	-0.0449229	-0.215806	-0.557573
	11	-0.523675	-0.166043	-0.0468327	-0.46407	-0.285254	-0.46407	-0.106438	0.310799	0.430009	0.191588
	12	-0.47865	-0.601606	0.0746518	0.0746518	-0.0483041	-0.417172	0.566476	0.0131738	0.935343	-0.417172
	13	-0.453817	0.220032	-0.213156	0.027504	0.508825	0.0756361	-0.790741	-0.261288	0.316296	-0.213156
	14	0.0791488	1.58603e-16	0.316595	0.395744	-0.316595	-0.554042	0.237446	-0.395744	0.554042	-0.0791488
	15	-0.471261	-0.0523624	-0.785435	-0.157087	0.261812	-0.157087	0.0523624	-0.366537	0.471261	-0.0523624
	16	0.309447	-0.56063	0.123002	-0.18774	0.154076	0.433744	0.247299	-0.18774	-0.56063	0.299089
	17	-0.86275	0	0.846472	-0.672837	1.70108	-0.29301	-0.0651132	0.846472	-0.00813915	-0.00813915
	18	-0.0741511	-0.203916	0.120496	0.444907	0.509789	-0.203916	0.185378	-0.463445	0.704436	-0.139033
	19	0.260062	-0.543071	-0.114733	0.420689	0.260062	-0.0611911	0.367147	-0.328902	0.527773	-0.435987
	20	-0.211882	-0.0635645	-0.582674	-0.28604	0.529704	-0.211882	0.381387	0.381387	0.678021	0.0847526
	21	-0.189368	-0.769306	-0.355065	-0.355065	-0.520761	-0.272216	-0.106519	0.224874	1.13621	0.142026
	22	0.0363577	-0.0484769	-0.133312	-0.47265	0.206027	-0.218146	0.6302	-0.47265	-0.0484769	0.0363577
	23	0.167562	-0.403055	-0.529859	-0.0226436	-0.0860455	-0.0226436	-0.0860455	0.294366	-0.149447	0.0407584
	24	0.878757	0.0272143	-0.05794	-0.313403	0.282677	0.112369	-0.05794	-0.143094	-0.398557	0.0272143
	25	-0.097045	-0.529336	0.335246	-0.158801	0.0882227	0.767538	-0.652848	0.211735	0.458758	-0.344069
	26	-0.25226	-0.317661	0.336347	0.00934298	0.728752	-0.18686	0.270946	0.597951	-0.513864	0.270946
	27	0.449199	-0.725629	-0.241876	-0.310984	0.103661	-0.518307	0.103661	0.380092	-0.518307	0.172769
	28	-0.321353	-0.0132063	-0.506242	-0.69113	-0.259724	-0.259724	0.664717	0.4182	0.603088	0.294941
	mean DtF	-0.0976995	-0.233375	0.0268803	-0.210595	0.236846	-0.0567158	0.167881	-0.00618352	0.189332	-0.0549478
	Cross Cuts	11.7362	9.8	16.7964	11.1	18.1326	11.5566	21.8643	11.4793	25.1891	13.5529
	Visual Change	0.1355	0.0676	0.2264	0.0725	0.2831	0.0802	0.319	0.0839	0.3335	0.0896

## Sheet: Videos (Exp 1)
NORMALISED DtF FOR CONDITIONS AND VIDEOS
		TIW (msec)
		800	1600	3200	6400	12800
Video	1	1.1	0.31	0.01	0.23	-0.03
	2	-0.78	-0.83	-1.23	-0.03	-0.57
	3	-0.53	1.01	1.59	1.57	0.42
	4	-0.17	-0.15	1.08	0.16	0.48
	5	-0.28	0.42	0.14	-0.37	0.49
	6	0.39	-0.38	-0.72	0.9	0.04
	7	0.86	1.28	-0.14	1.19	0.99
	8	-0.44	0.05	0.26	-0.68	0.32
	9	-0.35	-0.48	-0.78	-0.6	0.24
	10	-1.23	-0.86	0.09	-0.37	0.01
	11	0.43	-0.83	0.54	0.94	-0.16
	12	-0.78	0.85	0.83	1.33	1.56
	13	-0.05	1.55	1.56	1.1	1.05
	14	-0.42	-0.43	0.39	-0.41	-0.54
	15	-0.57	-0.15	0	0.73	-0.68
	16	0.16	-0.42	-0.03	0.28	0.24
	17	-0.18	-0.83	-0.95	0.94	-0.15
	18	-0.29	0.25	0.69	-0.4	0.35
	19	-1.51	0.13	-0.3	0.05	-0.24
	20	-1.14	-0.51	0.66	-0.44	-0.01
	21	0.17	0.75	1.08	1.13	0.6
	22	-0.78	-0.53	-0.38	0.78	0.52
	23	-0.72	-0.44	-0.53	-0.66	0.07
	24	-0.19	-0.34	0.66	-0.56	0.19
	25	-1.23	-0.58	-0.76	-0.23	0.08
	26	-0.45	-0.59	-1.24	-0.1	-0.57
	27	-0.23	-0.64	0.2	-0.45	0.42
	28	-0.81	0.04	-0.56	-0.54	-0.37
	29	-0.09	-0.48	0.51	-0.3	0.72
	30	-1.23	-1.14	-0.11	-0.78	0.05
	31	0.67	0.88	-0.86	-0.15	0.93
	32	-0.78	-0.87	-0.01	-1.51	0.09
	33	0.09	-0.17	1.75	1.17	0.15
	34	0.62	0.46	1.19	1.52	1.88
	35	0.51	0.35	0.99	1.2	0.31
	36	-0.83	0.87	0.31	0.79	-0.17
	37	0.11	0.45	1.36	0.78	-0.62
	38	-1.1	-0.99	-0.98	0.22	0.68
	39	-0.62	-0.76	-0.57	-0.41	-0.52
	40	-0.18	0.01	-0.53	-0.58	-0.68
	41	2.33	0.93	1.53	1.97	2.15
	42	0.52	-0.56	0.12	0.92	0.85
	43	-0.95	-0.3	-0.45	-1.09	-0.58
	44	-0.25	0	1.21	1.87	0.6
	45	-0.95	0.31	-0.95	-0.37	-0.68
	46	-0.45	-0.71	-0.09	0.47	-0.03
	47	-0.03	-0.68	0.89	-0.11	0.09
	48	-0.77	-0.16	0.68	1.03	0.8
	49	-1.65	-0.95	-0.37	-0.68	-1.09
	50	-0.66	-0.92	-1.1	-0.78	-0.11
	51	-0.07	1.17	0.15	0.32	0.32
	52	-0.58	-0.83	-1.81	-0.55	-0.43
	53	-1.05	-0.78	-0.87	0.46	0.02
	54	0.78	0.13	1.15	0.82	0.22
	55	-0.3	-0.56	-0.76	-0.99	-0.34
	56	0.24	0.08	0.17	1.36	1.6
	57	0.31	0.85	0.72	1.23	1.6
	58	-0.76	-0.64	-0.56	-0.83	-0.51
	59	-0.35	-0.81	-0.78	-0.41	0.03
	60	0.12	-0.03	-0.34	-0.57	-0.03
	61	-0.72	0.42	-0.17	0.23	0.6
	62	0.04	-0.41	1.76	0.45	1.56
	63	-0.43	-0.78	-0.72	-0.1	-0.41
	64	-1.18	-0.72	-0.78	-0.72	0.53
	65	-0.23	-1.06	-0.76	-0.36	0.08
	66	-0.52	0	0.01	-0.76	-0.03
	67	0.26	1.45	0.49	-0.51	0.14
	68	-1.1	-0.57	-0.68	-0.66	-1.04
	69	0.07	-0.24	0.25	-0.45	0.63
	70	0.27	0.11	1.7	0.86	0.63
	71	0.36	-0.95	0.8	0.13	-0.43
	72	-0.5	-0.98	0.18	-0.22	-0.19
	73	-0.1	-0.37	-0.68	-0.65	-0.55
	74	-0.35	-0.24	-0.5	-0.11	0.27
	75	1	0.42	-0.05	-0.03	0.24
	76	-0.68	-0.16	0.05	-0.39	-0.37
	77	-0.99	-0.68	-1.09	-1.1	0.14
	78	-0.95	-0.37	-0.6	-0.81	0.17
	79	1.15	0.94	1.83	1.45	1.17
	80	0.53	0.56	0.99	1.01	1.39
	81	-0.6	-0.71	0.31	-0.24	-0.17
	82	-0.16	-0.53	-0.4	-0.41	0.28
	83	-1.24	-0.99	-0.6	-0.54	0.8
	84	-0.11	-0.95	0.18	-0.37	-0.02
	85	0.24	-0.09	0.47	0.32	0.85
	86	-0.98	-0.69	-0.45	0.13	-0.58
	87	0.24	0.48	-0.71	0.42	2.07
	88	-0.76	-0.99	-0.37	0.62	0.21
	89	-0.05	-0.15	-0.99	-0.22	-0.37
	90	0.46	0.94	0.85	0.72	0.63

## Sheet: Videos (Exp 2)
NORMALISED DtF FOR CONDITIONS AND VIDEOS
		TIW (msec)
		800	1600	3200	6400	12800
Video	1	0.46	0.79	-0.3	0.5	0.64
	2	-0.57	-0.79	0	-0.73	-0.39
	3	1.02	0.47	1.2	1.83	0.58
	4	-0.2	-0.27	0.16	0.26	0.06
	5	0.5	-0.06	0.14	0.96	-0.51
	6	-0.45	-0.86	-0.72	-0.53	-0.63
	7	-0.57	0.92	1.23	0.41	0.15
	8	-0.01	-0.28	-0.47	-1.16	-0.12
	9	-0.36	-0.29	-0.32	-0.59	-0.7
	10	-0.94	-0.57	0.02	-0.9	-0.38
	11	0.11	0.56	0.62	0.08	0.32
	12	0.35	0.21	0.44	1.28	0.98
	13	0.48	0.04	0.68	0.97	1.54
	14	-0.61	-0.06	0.2	-0.8	-0.57
	15	-0.23	-0.59	-0.07	-0.42	-0.47
	16	-0.51	0.13	0.97	-0.29	0.2
	17	-0.54	-0.22	0.06	-0.13	-0.38
	18	-0.29	0.04	0.27	0.51	-0.42
	19	-0.4	0.51	-0.04	-0.4	-0.7
	20	-0.5	0.78	0.65	0.3	-0.2
	21	0.21	-0.06	-0.4	-0.18	-0.33
	22	-0.5	-0.42	-0.54	0.2	0.71
	23	-0.58	-0.09	-0.42	0.83	0.48
	24	-0.28	-0.21	0.59	-0.01	-0.26
	25	-0.85	-1.02	-0.14	-0.64	-0.74
	26	-0.56	-0.44	-0.48	-0.83	-0.96
	27	-0.45	-0.7	-0.44	-0.1	0.65
	28	-0.45	-0.28	0.5	-0.29	-0.41
	29	-0.24	0.45	0.75	0.17	0.91
	30	-0.85	-0.62	-0.4	0.32	0.05
	31	-0.12	0.4	0.54	1.56	0.64
	32	-0.3	-0.17	0.16	-0.71	-0.24
	33	0.62	1.12	0.56	1.4	1.06
	34	1.46	1.38	1.59	1.09	1.47
	35	1.74	0.47	0.51	0.76	0.79
	36	0.96	0.53	0.7	0.06	-0.17
	37	-0.27	-0.11	0.34	0.23	0.62
	38	-0.53	-0.7	-0.08	-0.15	-0.37
	39	0.12	-0.7	-0.36	-0.55	-0.47
	40	-0.55	-0.83	0.14	-0.29	-0.56
	41	1.73	1.83	2.06	1.69	1.82
	42	0.6	0.41	0.33	0.86	0.56
	43	-0.01	-0.9	-0.62	0.5	-0.37
	44	-0.01	0.16	0.59	0.84	0.48
	45	-0.43	-0.95	-0.56	-0.45	-0.47
	46	-0.6	0.31	-0.55	0.29	0.03
	47	-0.85	0.41	0.05	0.63	-0.6
	48	0.41	0.51	0.2	1.01	-0.07
	49	-0.9	-0.64	-0.84	-0.76	-0.8
	50	-0.66	-0.61	-0.16	-0.85	-0.52
	51	-0.17	-0.01	0	0.13	-0.86
	52	-0.94	-0.92	-0.64	-0.9	-0.92
	53	-0.83	-0.61	-0.36	-0.07	0.51
	54	0.05	-0.32	0.18	0.76	0.7
	55	-0.73	-1.3	0.04	0.03	-0.56
	56	0.59	0.65	1.08	0.97	0.88
	57	0.39	0.05	1.13	1.22	0.55
	58	-0.68	-0.04	-0.28	-0.25	0.06
	59	-0.58	-1.17	-0.93	-0.76	-0.81
	60	0.26	-0.3	-0.68	-0.48	-0.59
	61	-0.42	0.62	0.2	-0.06	0.92
	62	0.15	-0.25	0.68	-0.14	-0.02
	63	-0.57	0.07	0.33	0.06	0.13
	64	-0.78	-0.9	-0.71	-0.99	-1.15
	65	-0.17	-0.81	-0.03	-0.36	-0.55
	66	-0.57	-0.08	-0.22	-0.4	-0.26
	67	-0.02	-0.41	-0.43	0.25	-0.01
	68	-1.3	-0.72	-0.72	-0.85	-0.89
	69	-0.83	-0.24	-0.38	-0.69	-0.37
	70	-0.57	1.6	1.37	1.03	1.05
	71	-0.94	0.83	-0.49	0.37	0.6
	72	-0.87	-0.88	-0.01	-0.63	0.34
	73	0.21	-0.57	-0.34	0.83	-0.2
	74	-0.32	-0.22	-0.37	-0.61	-0.13
	75	-0.71	0.41	-0.58	0.23	0.06
	76	0.28	0.49	-0.2	-0.15	-0.33
	77	-0.59	-0.92	-0.42	-0.25	-1.04
	78	-0.2	-0.9	-0.16	0.5	-0.67
	79	1.61	0.7	1.37	1.45	1.22
	80	0.72	0.06	0.99	0.47	0.28
	81	-1	-0.6	-0.57	-0.11	-0.28
	82	0.35	-0.27	-0.41	0.19	0.18
	83	-0.79	-0.11	-0.52	-0.61	0.29
	84	-0.3	-0.8	0.34	-0.81	-0.47
	85	0.03	0.33	0.65	-0.1	-0.24
	86	-0.36	-0.79	-0.74	-0.8	-0.25
	87	0.32	0.36	0.63	-0.24	1.3
	88	-0.32	-0.67	-0.39	-0.34	0.3
	89	0.06	0.03	-0.17	-0.34	0.13
	90	0.42	1.23	1.41	0.78	1.19
	91	0.16	-0.28	0.04	0.43	0.96
	92	-0.33	0.31	-0.16	-0.25	-0.38
	93	-0.76	-0.55	-0.9	-0.58	0.02
	94	-0.19	-0.55	0.85	-0.01	0.01
	95	0.5	-0.78	0.24	-0.18	1.19
	96	-0.85	1.13	-0.07	0.97	0.64
	97	0.21	0.19	0.13	-0.04	0.83
	98	-0.42	-0.3	1.09	0.53	1.4
